# Supplementary material
Source: Springer Nature journal article supplement (https://www.springermedizin.de/resource/supplementary/12889_2009_1614_MOESM1_ESM.pdf/9503554)
Supplement: MOESM1 [file 9503554]

**PATIENTS SCREENED (n = 1454) BETWEEN APRIL 2004 and JANUARY 2007**

**SELECTED  
(n=724)**

**REJECTED  
(n=730)**

**NEW CASES  
PREVIOUSLY  
UNTREATED**

(n=493)

**FIRST LINE  
TREATMENT-  
FAILURES**

(n=231)

- SPUTUM PROCESSING
- DRUG SUSCEPTIBILITY TESTING

**NEW CASES (643)**

1. PRIOR ANTITUBERCULAR THERAPY (24%)
2. MORE THAN 5 DOSES OF ANTI TUBERCULAR THERAPY BEFORE SAMPLING (41%)
3. RESIDENCY (9%)
4. REFUSED (22%)
5. OTHERS (4%)

**FIRST LINE TREATMENT-  
FAILURES (87)**

1. PRIOR ANTITUBERCULAR THERAPY (26%)
2. INTERRUPTION IN TREATMENT FOR MORE THAN 2 WEEKS (47%)
3. RESIDENCY (6%)
4. REFUSED (7%)
5. OTHERS (14%)
